# Supplementary material
Source: HighWire-hosted journal article supplement (https://cmaj.ca/highwire/filestream/70386/field_highwire_adjunct_files/0/180177-res-1-at.pdf)
Supplement: 180177-res-1-at.pdf [file 180177-res-1-at.pdf]

**Appendix 1 (as supplied by the authors):** Supplemental Table 1. Age standardized incidence, one-year mortality and heart failure hospitalization rates of ambulatory heart failure patients. Incidence rates are expressed per 100,000 population. Mortality rates are expressed per 1000 population. Hospitalization rates are per 1000 person-years.

| Year | Sex    | HF Cases | Deaths | Standardized Rate |               | Standardized Rate |              | Standardized Rate |              |
|------|--------|----------|--------|-------------------|---------------|-------------------|--------------|-------------------|--------------|
|      |        |          |        | Incidence         | 95% CI        | Mortality         | 95% CI       | Hospitalization   | 95% CI       |
| 2009 | Female | 8433     | 1464   | 213.5             | (208.8-218.2) | 89.4              | (79.7-100.1) | 89.7              | (79.4-101.1) |
|      | Male   | 9312     | 1461   | 313.4             | (307.0-319.9) | 88.2              | (80.0-97.0)  | 102.9             | (92.4-114.3) |
| 2010 | Female | 8366     | 1373   | 208.4             | (203.8-213.1) | 86.8              | (76.6-98.0)  | 85.3              | (75.4-96.1)  |
|      | Male   | 9262     | 1396   | 301.9             | (295.8-308.2) | 81.9              | (74.9-89.4)  | 96.1              | (86.9-105.9) |
| 2011 | Female | 8424     | 1418   | 201.8             | (197.4-206.3) | 81.5              | (71.4-92.7)  | 86.9              | (76.9-97.8)  |
|      | Male   | 9292     | 1381   | 294.2             | (288.2-300.2) | 82.1              | (74.9-89.9)  | 98.1              | (88.0-109.1) |
| 2012 | Female | 8526     | 1404   | 199.9             | (195.6-204.4) | 85.5              | (75.8-96.0)  | 98.8              | (87.2-111.5) |
|      | Male   | 9585     | 1377   | 293.5             | (287.6-299.5) | 76.5              | (69.6-84.0)  | 93.0              | (84.3-102.4) |
| 2013 | Female | 8997     | 1497   | 205.8             | (201.4-210.3) | 84.8              | (75.2-95.3)  | 97.6              | (86.0-110.3) |
|      | Male   | 10510    | 1523   | 312.8             | (306.8-318.9) | 83.0              | (75.3-91.2)  | 91.1              | (82.3-100.7) |

HF, heart failure; CI, confidence interval

Supplemental Table 2. Multivariable predictors of one-year mortality.

| Variable                             | Adjusted HR<br>(95% CI) |
|--------------------------------------|-------------------------|
| <b>Age Category</b>                  |                         |
| <b>40-64 years</b>                   | Reference               |
| <b>65-74 years</b>                   | 1.54 (1.44-1.64)        |
| <b>75-84 years</b>                   | 2.58 (2.43-2.73)        |
| <b>&gt; 85 years</b>                 | 4.89 (4.62-5.18)        |
| <b>Female</b>                        | 0.97 (0.93-1.00)        |
| <b>Rural</b>                         | 1.01 (0.96-1.06)        |
| <b>Income Quintile</b>               |                         |
| <b>1 (Low)</b>                       | 1.08 (1.02-1.14)        |
| <b>2</b>                             | 1.04 (0.98-1.09)        |
| <b>3</b>                             | 0.99 (0.94-1.04)        |
| <b>4</b>                             | 1.01 (0.95-1.06)        |
| <b>5 (High)</b>                      | Reference               |
| <b>Benign Hypertension</b>           | 0.78 (0.75-0.81)        |
| <b>Complicated Hypertension</b>      | 0.77 (0.73-0.81)        |
| <b>Atrial Fibrillation</b>           | 0.99 (0.95-1.04)        |
| <b>Myocardial Infarction</b>         | 0.98 (0.94-1.03)        |
| <b>Valvular Disease</b>              | 0.93 (0.86-1.00)        |
| <b>Peripheral Arterial Disease</b>   | 1.34 (1.24-1.44)        |
| <b>Cerebrovascular Disease</b>       | 1.20 (1.13-1.28)        |
| <b>Pulmonary Circulatory Disease</b> | 1.24 (1.12-1.37)        |
| <b>COPD/Asthma</b>                   | 1.17 (1.13-1.21)        |
| <b>Alcohol Abuse</b>                 | 1.62 (1.45-1.82)        |
| <b>Renal Disease</b>                 | 1.67 (1.58-1.77)        |
| <b>Diabetes</b>                      | 1.13 (1.10-1.17)        |
| <b>Hypothyroidism</b>                | 1.06 (0.96-1.17)        |
| <b>Liver Disease</b>                 | 2.34 (2.12-2.59)        |
| <b>Dementia</b>                      | 1.96 (1.84-2.09)        |
| <b>Depression</b>                    | 1.16 (1.06-1.28)        |
| <b>Psychosis</b>                     | 1.43 (1.17-1.76)        |
| <b>Primary Tumor</b>                 | 1.64 (1.56-1.73)        |
| <b>Metastatic Cancer</b>             | 3.42 (3.17-3.70)        |
| <b>Paraplegia</b>                    | 1.53 (1.35-1.75)        |
| <b>Venous Thromboembolism</b>        | 1.40 (1.24-1.58)        |

---

HR, hazard ratio; CI, confidence interval; COPD, chronic obstructive pulmonary disease
